## RESEARCH ARTICLE

# Lactate kinetics of rainbow trout during graded exercise: do catheters affect the cost of transport?

Loïc Teulier<sup>1,2</sup>, Teye Omlin<sup>1</sup> and Jean-Michel Weber<sup>1,\*</sup>

<sup>1</sup>Department of Biology, University of Ottawa, Ottawa, ON K1N 6N5, Canada and <sup>2</sup>Laboratoire d'Ecologie des Hydrosystèmes Naturels et Anthropisés, UMR 5023, CNRS, Université de Lyon 1, Lyon, France

\*Author for correspondence (jmweber@uOttawa.ca)

### SUMMARY

Changes in lactate kinetics as a function of exercise intensity have never been measured in an ectotherm. Continuous infusion of a tracer is necessary to quantify rates of lactate appearance ( $R_a$ ) and disposal ( $R_d$ ), but it requires double catheterization, which could interfere with swimming. Using rainbow trout, our goals were to: (1) determine the potential effects of catheters and blood sampling on metabolic rate ( $\dot{M}_{O_2}$ ), total cost of transport (TCOT), net cost of transport (NCOT) and critical swimming speed ( $U_{crit}$ ), and (2) monitor changes in lactate fluxes during prolonged, steady-state swimming or graded swimming from rest to  $U_{crit}$ . This athletic species maintains high baseline lactate fluxes of  $24 \mu\text{mol kg}^{-1} \text{min}^{-1}$  that are only increased at intensities  $>2.4$  body lengths (BL)  $\text{s}^{-1}$  or 85%  $U_{crit}$ . As the fish reaches  $U_{crit}$ ,  $R_a$  is more strongly stimulated (+67% to  $40.4 \mu\text{mol kg}^{-1} \text{min}^{-1}$ ) than  $R_d$  (+41% to  $34.7 \mu\text{mol kg}^{-1} \text{min}^{-1}$ ), causing a fourfold increase in blood lactate concentration. Without this stimulation of  $R_d$  during intense swimming, lactate accumulation would double. By contrast, steady-state exercise at  $1.7 \text{ BL s}^{-1}$  increases lactate fluxes to  $\sim 30 \mu\text{mol kg}^{-1} \text{min}^{-1}$ , with a trivial mismatch between  $R_a$  and  $R_d$  that only affects blood concentration minimally. Results also show that the catheterizations and blood sampling needed to measure metabolite kinetics in exercising fish have no significant impact on  $\dot{M}_{O_2}$  or TCOT. However, these experimental procedures affect locomotion energetics by increasing NCOT at high speeds and by decreasing  $U_{crit}$ .

Key words: lactate turnover, carbohydrate metabolism, locomotion energetics, fish exercise, critical swimming speed,  $U_{crit}$ , continuous tracer infusion, respirometry, *Oncorhynchus mykiss*.

Received 13 May 2013; Accepted 29 August 2013

### INTRODUCTION

As a glycolytic end-product, oxidative fuel and gluconeogenic substrate, lactate is one of the most dynamic intermediates of cell metabolism (Brooks, 1991; Gladden, 2004; Philp et al., 2005). Animals process lactate at high rates even under resting, normoxic conditions, and in mammals, many studies have shown that inherently high baseline lactate fluxes are strongly stimulated during exercise (Bergman et al., 1999; Donovan and Brooks, 1983; Issekutz et al., 1976; Stanley et al., 1985; Van Hall et al., 2003; Weber et al., 1987). Little is known about lactate fluxes in fish because adequate methods to quantify these fluxes accurately under controlled exercise conditions have only recently become available. Previous studies of fish lactate kinetics report turnover rates that were estimated by bolus injection (Cameron and Cech, 1990; Milligan and McDonald, 1988; Weber, 1991; Weber et al., 1986), an obsolete method with significant limitations (Omlin and Weber, 2010; Wolfe, 1992). They show that the lactate turnover rate of rainbow trout doubles during prolonged, low-intensity swimming (Weber, 1991). Although no measurements have been made at higher swimming speeds, a threefold to 10-fold increase over baseline has been observed during recovery from exhausting exercise for channel catfish (*Ictalurus punctatus*), coho salmon (*Oncorhynchus kisutch*) and starry flounder (*Platichthys stellatus*) (Cameron and Cech, 1990; Milligan and McDonald, 1988). Continuous tracer infusion techniques have been adapted and validated for fish (Haman et al., 1997; Haman and Weber, 1996).

They have been used to quantify the rates of metabolite appearance ( $R_a$ ) and disposal ( $R_d$ ) accurately under non-steady state conditions. In particular, continuous infusion has been used to characterize the effects of swimming on glucose and lipid kinetics (Bernard et al., 1999; Magnoni et al., 2008; Shaghavi and Weber, 1999). Unfortunately, these fish measurements only deal with prolonged, low-intensity swimming. Therefore, nothing is known about the differential effects of higher intensity exercise on the rates of lactate production and disposal when significant changes in blood lactate concentration are observed.

Measuring metabolite kinetics by continuous infusion during swimming may be problematic because two catheters exiting from the snout of the fish are necessary (Haman and Weber, 1996). The hydrodynamic drag associated with these catheters may interfere with locomotion, and blood sampling may decrease capacity for oxygen transport. Therefore, cannulated fish may have a different metabolic rate ( $\dot{M}_{O_2}$ ), a higher cost of transport [total (TCOT) or net (NCOT)] (Schmidt-Nielsen, 1972) and a lower critical swimming speed ( $U_{crit}$ ) (Farrell, 2008) than non-catheterized animals. The cost of transport is the amount of energy (or oxygen) used to move one unit body mass by one unit distance. TCOT is the total amount of energy needed to power movement, including the cost of sustaining life in resting tissues. By contrast, NCOT only accounts for the cost of locomotion, but it also excludes all maintenance costs incurred at rest. To allow meaningful comparisons between fish studies, exercise intensity

Table 1. Morphological characteristics and metabolic rate ( $\dot{M}_{O_2}$ ) of rainbow trout in the different treatment groups

|                                                                    | Graded swimming |                |                  |                       |
|--------------------------------------------------------------------|-----------------|----------------|------------------|-----------------------|
|                                                                    | Control         | Sham           | Lactate kinetics | Steady-state swimming |
| <i>N</i>                                                           |                 | 6              | 8                | 6                     |
| Body mass (g)                                                      |                 | 338.8±14.7     | 369.0±10.1       | 487.6±11.4            |
| Body length (cm)                                                   |                 | 32.4±0.7       | 33.6±0.4         | 35.4±0.4              |
| Resting $\dot{M}_{O_2}$ (μmol kg <sup>-1</sup> min <sup>-1</sup> ) | 64.7±5.8        | 61.4±4.6       | 57.4±2.5         | —                     |
| Highest $\dot{M}_{O_2}$ (μmol kg <sup>-1</sup> min <sup>-1</sup> ) | 247.7±1.2 (2)   | 224.0±38.7 (4) | 201.7±9.5 (5)    | —                     |

The same individuals were measured twice in random order for the control and sham-catheterized conditions. Sample size (*N*) is indicated on the first line, except for the highest  $\dot{M}_{O_2}$  measured, where *N* is in parentheses (because not all individuals within each group were able to reach the highest speed). Values are means ± s.e.m.

is traditionally standardized as % $U_{crit}$  or as swimming speed in body lengths (BL) per second. However, it is unclear whether non-instrumented and catheterized animals swimming at the same % $U_{crit}$  or at the same speed have the same  $\dot{M}_{O_2}$ . Therefore, the goals of this study were to: (1) determine whether double catheterization and blood sampling have an effect on  $\dot{M}_{O_2}$ , TCOT, NCOT or  $U_{crit}$  in rainbow trout, (2) apply continuous tracer infusion methods to measure the effects of steady swimming on lactate fluxes and (3) determine the relationship between exercise intensity and the rates of lactate production and disposal, using a graded swimming protocol.

MATERIALS AND METHODS

Animals

Male and female rainbow trout [*Oncorhynchus mykiss* (Walbaum)] were purchased from Linwood Acres Trout Farm (Campbellcroft, ON, Canada) (see Table 1). They were held in a 1300 liter flow-through tank containing dechlorinated, well-oxygenated water at 13°C for at least 2 weeks before experiments. Fish were kept under a 12 h:12 h light:dark photoperiod and fed commercial floating pellets (Martin Mills, Elmira, ON, Canada) three times a week until satiation. The effects of exercise were measured either during prolonged, steady-state swimming at 1.7 BL s<sup>-1</sup> or during graded swimming ( $U_{crit}$  protocol). Fish used for graded exercise were randomly divided into two sub-groups: control/sham-catheterization (to measure swimming energetics only) and actual catheterization (to measure swimming energetics and lactate kinetics). To avoid training or fatigue effects in the first sub-group, locomotion energetics were measured in random order for the control (no catheters) and sham-catheterized conditions in the same individuals. The steady-state swimming group was catheterized to measure lactate kinetics only. All procedures were approved by the Animal Care Committee of the University of Ottawa and adhered to the guidelines established by the Canadian Council on Animal Care for the use of animals in research.

Catheterizations

Fish were fasted for at least 24 h before surgery. They were anesthetized with ethyl-*N*-aminobenzoate sulfonic acid (MS-222; 60 mg l<sup>-1</sup>) in well-oxygenated water. The animals used to measure lactate kinetics were doubly cannulated in the dorsal aorta using PE-50 catheters (Intramedic, Clay-Adams, Sparks, MD, USA), as detailed elsewhere (Haman and Weber, 1996). The catheters were kept patent by flushing with Cortland saline (Wolf, 1963) containing 50 U ml<sup>-1</sup> heparin (Sigma-Aldrich, St Louis, MO, USA). Only animals with a hematocrit >20% after recovery from surgery were used in tracer experiments. For the sham-catheterized group, the two catheters were sutured to the palate, but they were not inserted in the dorsal aorta. The aim of sham-catheterization was to produce

the same hydrodynamic drag experienced during actual tracer experiments, but without affecting the vasculature or drawing blood samples.

Swim tunnel respirometry

All experiments were carried out at 13°C in a 90 liter swim tunnel respirometer (Loligo Systems, Tjele, Denmark) filled with the same quality water as the holding tank. A ‘honeycomb’ grid was placed before the swimming chamber to promote laminar flow. The fish always swam in the anterior part of the chamber (kept dark) to avoid the posterior part (brightly lit). The swim tunnel was calibrated with a flow probe (Global Water Geotech, Denver, CO, USA) to establish the linear relationship between water velocity (cm s<sup>-1</sup>) and motor speed (rpm). Swimming speeds were corrected for solid blocking as in Claireaux et al. (Claireaux et al., 2006).  $\dot{M}_{O_2}$  was measured by intermittent flow respirometry using galvanic oxygen probes connected to a DAQ-PAC-G1 instrument controlled with AutoResp software (version 2; Loligo Systems). The oxygen probes were calibrated before measurements using N<sub>2</sub>-saturated water (0% O<sub>2</sub>) and air-saturated water (20.9% O<sub>2</sub>). Before experiments, each fish was placed in the swim tunnel overnight for acclimation to the experimental setup. During this period, water velocity was kept at 0.5 BL s<sup>-1</sup>, a low speed requiring no swimming but enabling the fish to rest at the bottom of the respirometer.  $U_{crit}$  and the effects of graded exercise on  $\dot{M}_{O_2}$ , cost of transport and lactate kinetics were quantified using a stepwise  $U_{crit}$  protocol (Jain et al., 1997) with velocity increments of 0.2 BL s<sup>-1</sup> every 20 min. Graded swimming experiments were terminated at exhaustion, when the fish was unable to remove itself from the rear grid.

Lactate kinetics

The catheters were made accessible through the swim tunnel lid by channeling them through a water-tight port. The rates of lactate appearance ( $R_a$ ) and lactate disposal ( $R_d$ ) were measured by continuous infusion of [U-<sup>14</sup>C] lactate (New England Nuclear, Boston, MA, USA; 4.84 GBq mmol<sup>-1</sup>). Infusates were freshly prepared immediately before each experiment by drying an aliquot of the solution obtained from the supplier under N<sub>2</sub> and resuspending in Cortland saline. Labeled lactate was infused for 1 h in resting fish to quantify baseline lactate kinetics. It was administered at a rate of 2029±227 Bq kg<sup>-1</sup> min<sup>-1</sup> (*N*=15) using a calibrated syringe pump (Harvard Apparatus, South Natick, MA, USA) at 1 ml h<sup>-1</sup>. Under these conditions, isotopic steady-state is reached in <45 min (Omlin and Weber, 2010). Lactate (labeled + unlabeled) was infused at rates accounting for <0.002% of the endogenous  $R_a$  measured in resting fish. Tracer infusion was continued either for 4–5 h to complete a  $U_{crit}$  protocol (graded exercise experiments) or for 2 h at 1.7 BL s<sup>-1</sup> (steady-state exercise experiments). The water was kept normoxic throughout the measurements

( $10.64 \pm 0.07$  mg O<sub>2</sub> l<sup>-1</sup>). Blood samples (100 µl each) were drawn at the end of the initial resting period and at regular intervals during swimming (5 min before each stepwise velocity increment for graded exercise and every 10 min for steady-state exercise). The total amount of blood sampled from each fish accounted for <10% of blood volume. Samples were immediately deproteinized in 200 µl perchloric acid (6% w/w) and centrifuged for 5 min at 16,000 *g* (Eppendorf 5415C, Brinkmann, Rexdale, ON, Canada). Supernatants were kept frozen at -20°C until analyses.

### Sample analyses

Blood lactate concentration was measured spectrophotometrically (Bergmeyer, 1985) using a SpectraMax Plus384 Absorbance Microplate Reader (Molecular Devices, Sunnyvale, CA, USA). To measure activity, lactate was separated using ion exchange columns as described in Omlin and Weber (Omlin and Weber, 2010). Before passing through the columns, each deproteinized blood sample was neutralized with 1 mol l<sup>-1</sup> potassium bicarbonate and diluted with 5 ml deionized H<sub>2</sub>O. Preliminary experiments with known amounts of labeled lactate showed that 70% of total activity was recovered, and measured lactate activities were corrected accordingly. Radioactivity was measured by scintillation counting (Beckman Coulter LS 6500, Fullerton, CA, USA) in Bio-Safe II scintillation fluid (RPI Corp., Mount Prospect, IL, USA).

### Calculations and statistics

$U_{crit}$  (BL s<sup>-1</sup>) was calculated according to (Brett, 1964):

$$U_{crit} = V_f + [(t_f / t_i) \times V_i], \quad (1)$$

where  $V_f$  is the highest speed at which a full time interval was completed (BL s<sup>-1</sup>),  $V_i$  is the speed increment between intervals (0.2 BL s<sup>-1</sup>),  $t_f$  is the time spent swimming during the last interval causing exhaustion (min) and  $t_i$  is the full interval (20 min). The amount of energy needed to transport one unit body mass by one unit distance, or TCOT (Schmidt-Nielsen, 1972) was calculated from total  $\dot{M}_{O_2}$  as follows:

$$TCOT = \text{total } \dot{M}_{O_2} / U, \quad (2)$$

where TCOT is in µmol O<sub>2</sub> kg<sup>-1</sup> m<sup>-1</sup>,  $\dot{M}_{O_2}$  is in µmol O<sub>2</sub> kg<sup>-1</sup> min<sup>-1</sup> and  $U$  is the swimming speed in m min<sup>-1</sup>. NCOT was calculated similarly, but from net  $\dot{M}_{O_2}$  defined as swimming  $\dot{M}_{O_2}$  minus resting  $\dot{M}_{O_2}$ . Resting  $\dot{M}_{O_2}$  was obtained by averaging the 10 lowest values recorded during the night preceding the exercise measurements.  $R_a$  and  $R_d$  were calculated using the non-steady-state equations of Steele (Steele, 1959). Statistical comparisons were performed using one- or two-way repeated-measures ANOVA (RM ANOVA) with Dunnett's *post hoc* test to determine which means were different from baseline, or the Holm-Sidak test to compare treatments (SigmaPlot v.12, Systat Software, San Jose, CA, USA). When the assumptions of normality (Shapiro-Wilk test) or homoscedasticity (Levene's test) were not met, Friedman's RM ANOVA on ranks was used or the data were normalized by log<sub>10</sub> transformation before parametric analysis. All values presented are means ± s.e.m. and  $P < 0.05$  was used as the level of significance in all tests.

## RESULTS

### Graded swimming

#### Metabolic rate

Resting rates of oxygen consumption were not different between treatments ( $P > 0.05$ ; Table 1). Metabolic rate increased progressively with swimming speed and was higher than resting  $\dot{M}_{O_2}$  at all speeds ( $P < 0.001$ ; Fig. 1A). The exercise-induced increase in  $\dot{M}_{O_2}$  was not

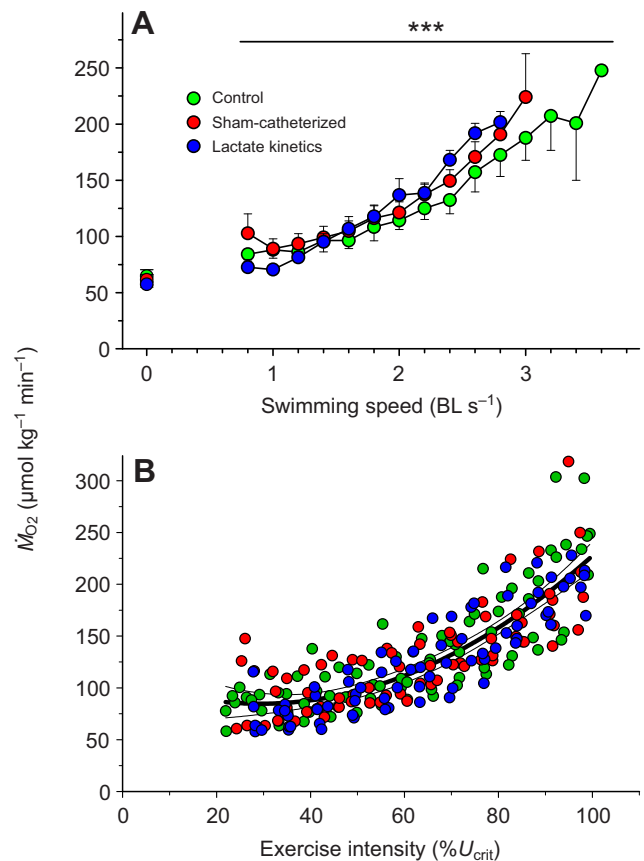

Fig. 1. Effects of graded swimming on the metabolic rate ( $\dot{M}_{O_2}$ ) of rainbow trout. Three groups of fish were measured: non-catheterized controls, sham catheterized animals and catheterized animals during the measurement of lactate kinetics. (A)  $\dot{M}_{O_2}$  as a function of swimming speed (in BL s<sup>-1</sup>). Values are means ± s.e.m. For speeds <3 BL s<sup>-1</sup>, sample sizes were  $N=6$  for the control and sham-catheterized groups, and  $N=8$  for the lactate kinetics group. Not all fish were able to swim at the higher speeds (where  $N < 6$ ). Asterisks indicate significant differences from resting values ( $***P < 0.001$ ). (B)  $\dot{M}_{O_2}$  as a function of exercise intensity (expressed as % $U_{crit}$ ). The three treatments were not significantly different from each other ( $P > 0.05$ ). The thick line was fitted by a second-order polynomial regression ( $r^2 = 0.72$ ,  $P < 0.001$ ):  $\dot{M}_{O_2} = 109.136 - 1.669(\%U_{crit}) + 0.0285(\%U_{crit})^2$ . Thin lines indicate confidence intervals ( $\pm 99\%$ ).

significantly different between groups ( $P > 0.05$ ). The highest  $\dot{M}_{O_2}$  was reached at the end of the graded exercise protocol (Table 1). Two individuals of the control group were able to reach the highest swimming speed of 3.6 BL s<sup>-1</sup> (Fig. 1A). Fig. 1B shows changes in  $\dot{M}_{O_2}$  as a function of exercise intensity expressed as % $U_{crit}$ . The three treatments were not different from each other ( $P > 0.05$ ) and the pooled data were fitted with a second-order polynomial regression ( $r^2 = 0.72$ ,  $P < 0.001$ ):  $\dot{M}_{O_2} = 109.136 - 1.669(\%U_{crit}) + 0.0285(\%U_{crit})^2$ .

#### Cost of transport and $U_{crit}$

Across speeds, treatment groups had the same TCOT ( $P = 0.28$ ; Fig. 2A), but a different NCOT ( $P < 0.01$ ; Fig. 2B). Maximum TCOT was measured at the lowest swimming speed of 0.8 BL s<sup>-1</sup> for all groups (Fig. 2A). As exercise intensity was increased, TCOT became lower than maximal values for all swimming speeds above 1 BL s<sup>-1</sup> ( $P < 0.001$ ). Averaged among groups, TCOT decreased from a maximum of 5.4 µmol O<sub>2</sub> kg<sup>-1</sup> m<sup>-1</sup> at 0.8 BL s<sup>-1</sup> to a minimum of 3.1 µmol O<sub>2</sub> kg<sup>-1</sup> m<sup>-1</sup> at 2.2 BL s<sup>-1</sup>. NCOT was also affected by exercise intensity (Fig. 2B) and was higher between 2.4 and 3.2 BL s<sup>-1</sup>

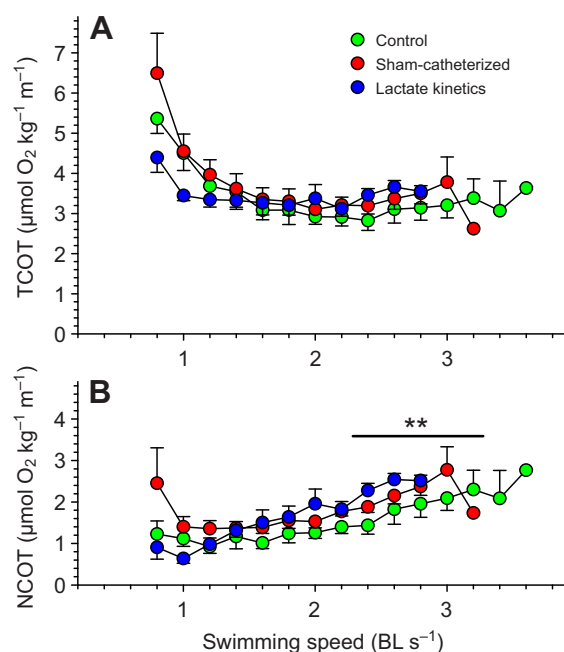

Fig. 2. Effects of graded swimming on the total and net cost of transport (TCOT and NCOT, respectively) in three groups of rainbow trout (non-catheterized controls, sham catheterized animals and catheterized animals during the measurement of lactate kinetics). Only the statistical differences between treatment groups are indicated directly on the graph (the effects of swimming speed are not). (A) TCOT was not different between groups, but it was lower at all speeds above  $1 \text{ BL s}^{-1}$  than at the lowest speed ( $0.8 \text{ BL s}^{-1}$ ) for all groups ( $P < 0.001$ ). (B) Between  $2.4$  and  $3.2 \text{ BL s}^{-1}$ , NCOT was lower in controls than in the other groups ( $**P < 0.01$ ) and it was higher than at  $0.8 \text{ BL s}^{-1}$  across groups ( $P < 0.01$ ).

than for the lowest swimming speed ( $P < 0.01$ ). Treatments had a significant effect on  $U_{\text{crit}}$  ( $P < 0.05$ ; Fig. 3), which was highest in controls ( $3.4 \text{ BL s}^{-1}$ ), intermediate in sham-catheterized animals ( $3.1 \text{ BL s}^{-1}$ ) and lowest for catheterized animals during the measurement of lactate kinetics ( $2.8 \text{ BL s}^{-1}$ ). Minimum TCOT was the same for all treatments ( $P > 0.05$ ), but occurred at different swimming speeds. Minimal NCOT was not different between controls and sham-catheterized animals ( $P > 0.05$ ), but it was higher for sham-catheterized animals than for lactate kinetics ( $P < 0.05$ ). Minimal TCOT was measured at higher swimming speeds ( $2.0$ – $2.4 \text{ BL s}^{-1}$ ) than minimal NCOT ( $1.0$ – $1.2 \text{ BL s}^{-1}$ ).

#### Effects of exercise intensity on lactate metabolism

Swimming speed was progressively increased over 4 h, following a classic stepwise  $U_{\text{crit}}$  protocol (Fig. 4A). Both  $R_a$  ( $P < 0.001$ ) and  $R_d$  ( $P < 0.01$ ) were strongly stimulated over time as exercise intensity increased (Fig. 4B). Mean  $R_a$  values above  $2.4 \text{ BL s}^{-1}$  (or above  $85\% U_{\text{crit}}$ ) were higher than baseline ( $P < 0.05$ ).  $R_a$  increased from a baseline level of  $24.2 \mu\text{mol kg}^{-1} \text{ min}^{-1}$  to a maximum of  $40.4 \mu\text{mol kg}^{-1} \text{ min}^{-1}$ .  $R_d$  increased from  $24.6 \mu\text{mol kg}^{-1} \text{ min}^{-1}$  to a maximum of  $34.7 \mu\text{mol kg}^{-1} \text{ min}^{-1}$ . Lactate concentration increased from a baseline value of  $1.3 \text{ mmol l}^{-1}$  to a maximum of  $5.1 \text{ mmol l}^{-1}$  with exercise intensity ( $P < 0.001$ ; Fig. 4C). Mean blood lactate concentrations for speeds above  $2.0 \text{ BL s}^{-1}$  were higher than baseline ( $P < 0.05$ ).

#### Steady-state swimming

##### Metabolic rate

The first 60 min were monitored at rest to quantify baseline lactate kinetics. The transition from rest to steady-state swimming was made

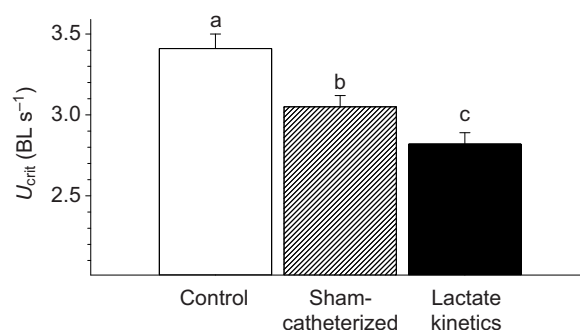

Fig. 3. Critical swimming speed ( $U_{\text{crit}}$ ) in three groups of exercising rainbow trout (non-catheterized controls, sham catheterized animals and catheterized animals during the measurement of lactate kinetics). Values are means  $\pm$  s.e.m. ( $N=6$  for controls and sham-catheterized,  $N=7$  for lactate kinetics). Different letters indicate significant differences between treatments ( $P < 0.05$ ).

progressively over 30 min before maintaining a constant speed of  $1.7 \text{ BL s}^{-1}$  for 90 min (Fig. 5A). Metabolic rate increased from resting levels of  $\sim 80 \mu\text{mol O}_2 \text{ kg}^{-1} \text{ min}^{-1}$  to a maximum of  $126.8 \mu\text{mol O}_2 \text{ kg}^{-1} \text{ min}^{-1}$  after 40 min of exercise (Fig. 5B).  $\dot{M}_{\text{O}_2}$  was maintained above resting values between 40 and 80 min ( $P < 0.05$ ) before declining to  $99.9 \mu\text{mol O}_2 \text{ kg}^{-1} \text{ min}^{-1}$  over the last 30 min.

#### Steady exercise and lactate metabolism

Blood lactate concentration increased from a resting value of  $0.7$  to  $\sim 1.4 \text{ mmol l}^{-1}$  during the first 30 min of steady swimming at  $1.7 \text{ BL s}^{-1}$ , and stayed at that level until the end of the experiment ( $P < 0.05$ ; Fig. 6A). Both  $R_a$  and  $R_d$  increased over time ( $P < 0.001$ ; Fig. 6B) from baseline values of  $22.4$  ( $R_a$ ) and  $23.7 \mu\text{mol kg}^{-1} \text{ min}^{-1}$  ( $R_d$ ) to maximal levels of  $30.9$  ( $R_a$ ) and  $29.8 \mu\text{mol kg}^{-1} \text{ min}^{-1}$  ( $R_d$ ). Mean  $R_a$  and  $R_d$  were higher than baseline between 30 and 50 min of steady-state swimming ( $P < 0.05$ ), but returned to resting values for the last 60 min of exercise ( $P > 0.05$ ).

#### DISCUSSION

This study is the first to characterize the relationship between exercise intensity and lactate kinetics in an ectotherm. It shows that the lactate fluxes of rainbow trout are stimulated at speeds greater than  $2.4 \text{ BL s}^{-1}$  (or  $\sim 85\% U_{\text{crit}}$ ), when lactate production starts diverging from lactate disposal. At these high exercise intensities, the change in  $R_a$  stops being matched by the increase in  $R_d$ , leading to a significant accumulation of glycolytic end-product in the circulation. By contrast, steady-state submaximal exercise causes  $R_a$  and  $R_d$  to increase similarly from  $\sim 20$  to  $\sim 30 \mu\text{mol kg}^{-1} \text{ min}^{-1}$ , with a trivial mismatch between production and disposal that affects blood concentration only minimally (from  $0.7$  to  $1.4 \text{ mmol l}^{-1}$ ). Earlier measurements by bolus injection had underestimated true lactate fluxes, but the same relative effect of steady, low-intensity swimming was observed (Weber, 1991). The present results show that catheterization has no impact on metabolic rate and cost of transport below  $85\% U_{\text{crit}}$ . At these submaximal speeds, swimming energetics are not affected by the catheters or by sampling blood, and, therefore, all the parameters of metabolite kinetics measured by continuous tracer infusion also apply to non-instrumented fish. Above  $85\% U_{\text{crit}}$ , catheterization increases NCOT, and direct comparisons between intact and instrumented animals swimming at the same speed should be made with caution.



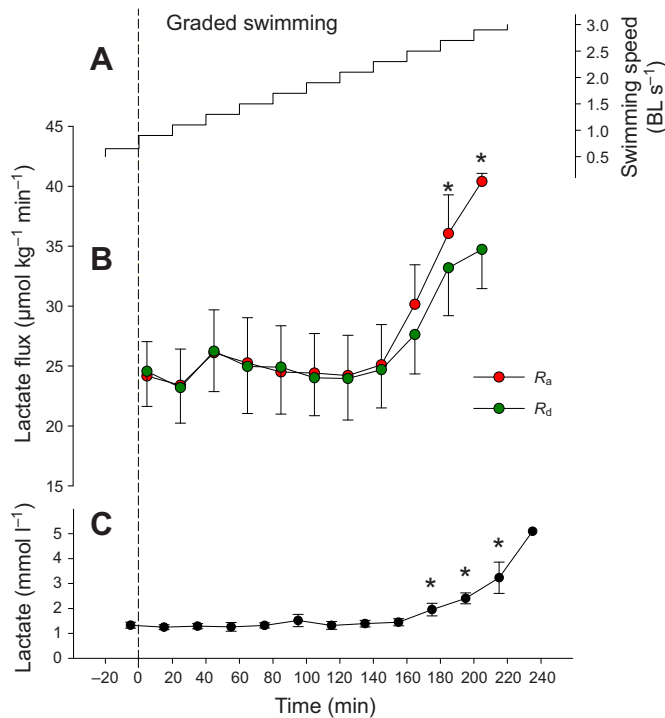

Fig. 4. Effects of graded exercise on lactate metabolism in rainbow trout: (A) changes in swimming speed, (B) lactate fluxes and (C) blood lactate concentration. B shows the rates of lactate appearance ( $R_a$ , in red) and disposal ( $R_d$ , in green). Exercise was started at time 0 (dashed line) and tracer infusion at -60 min. Values are means  $\pm$  s.e.m. (for lactate fluxes,  $N=7$  before 180 min, and  $N=4$  and 2 for the last two points). Asterisks indicate significant differences from baseline ( $P<0.05$ ).

#### Lactate production during swimming

Below 85%  $U_{crit}$ , swimming has no effect on the  $R_a$  and  $R_d$  of rainbow trout (Fig. 4). At higher speeds, glycolysis is sharply stimulated, causing an increase in lactate production from 24 to 40  $\mu\text{mol kg}^{-1} \text{min}^{-1}$  (Fig. 4B). This 67% rise in  $R_a$  was measured at the highest speed allowing metabolite flux measurements in a swimming fish. Trout may be able to upregulate  $R_a$  more strongly than reported here, as previous studies have suggested several-fold changes for flounder, salmon and catfish between rest and recovery from exhausting exercise (Cameron and Cech, 1990; Milligan and McDonald, 1988). However, these fluxes measured post-exercise were estimated by bolus injection and may need to be confirmed with more reliable methods.

The stimulation of lactate flux is stronger in mammals than in trout: submaximal exercise induces a sixfold increase in dogs (Issekutz et al., 1976), thoroughbred horses (Weber et al., 1987) and humans (Bergman et al., 1999). Moreover, humans can increase lactate production by 22-fold over resting values during a graded exercise protocol similar to what was used here for fish (Stanley et al., 1985). Trout may only be able to show a modest relative increase in flux because their metabolic scope is much smaller than that of mammals (Brett, 1972). Also, greater stimulation of lactate fluxes may not be possible for trout because their baseline levels could already be quite high. This notion is supported by the fact that the  $R_a/\dot{M}_{O_2}$  ratios of trout and humans are similar during intense exercise (8.9 for trout *versus* 6.4 for humans), but much higher in resting trout (19.5) than in resting humans (only 2.9) (Stanley et al., 1985; present study).

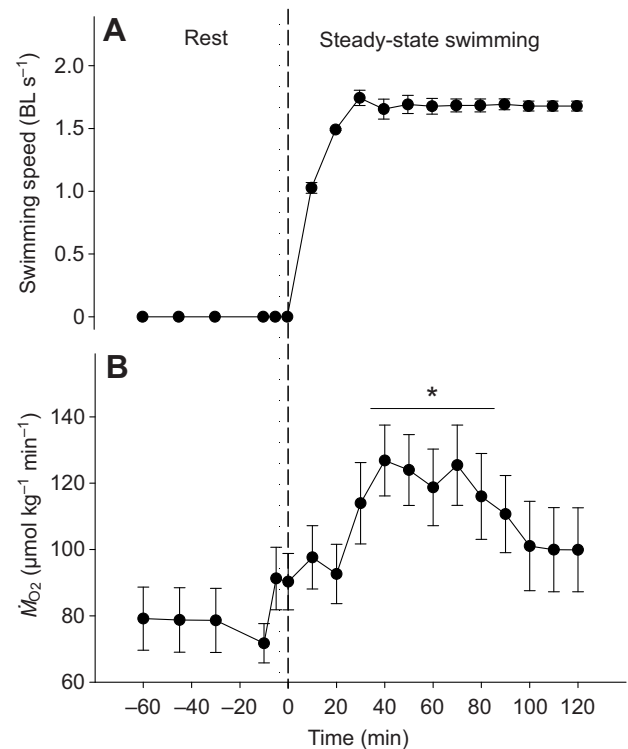

Fig. 5. Changes in (A) swimming speed and (B)  $\dot{M}_{O_2}$  over time for rainbow trout during steady-state exercise experiments. Values are means  $\pm$  s.e.m. ( $N=7$ ). Asterisk indicates a significant difference from resting  $\dot{M}_{O_2}$  (\* $P<0.05$ ). Dashed line indicates the time at which exercise was started.

#### Intense exercise stimulates lactate disposal

Above 85%  $U_{crit}$ ,  $R_d$  increases by 41% (Fig. 4B). Without this response, circulating lactate would reach twice the concentration actually observed at the end of exercise (Fig. 4C). Therefore, increasing the rate of lactate disposal during intense swimming plays an important role in reducing the lactate load on the circulation, a metabolic strategy previously noticed during exposure to hypoxia [fig. 5 in Omlin and Weber (Omlin and Weber, 2010)]. Such a response is rather surprising at a time when anaerobic glycolysis is stimulated. As the only two pathways available for lactate clearance, how could gluconeogenesis and/or oxidation contribute to the increase in  $R_d$ ? The effects of swimming on gluconeogenesis have never been measured directly in fish, but several tracer studies suggest that this pathway is not stimulated by exercise (reviewed in Moyes and West, 1995). Hepatic glucose production actually decreases during submaximal swimming, but it is unclear whether gluconeogenesis or glycogenolysis is responsible for this decline (Shanghavi and Weber, 1999). Intuitively, stimulating gluconeogenesis during swimming would seem undesirable because glucose synthesis is energetically costly [6 ATP per glucose (Clark et al., 1974)]. Overall, current information suggests that the stimulation of lactate disposal reported here is not accounted for by gluconeogenesis, but by an increase in lactate oxidation. Highly aerobic tissues such as heart, red muscle, kidney and brain can readily use lactate as an oxidative fuel (Bilinski and Jonas, 1972; Soengas and Aldegunde, 2002), and they are probably responsible for increasing lactate clearance during exercise. For example, perfused trout heart experiments show that lactate oxidation is stimulated when cardiac work or lactate availability becomes elevated (Lanctin et al., 1980; Milligan and Farrell, 1991). In addition, important physiological roles for various lactate shuttles

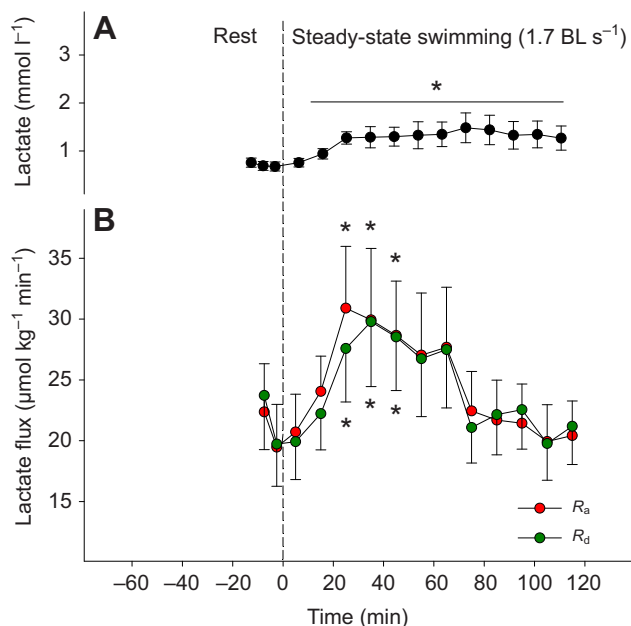

Fig. 6. Changes in (A) blood lactate concentration and (B) lactate fluxes in rainbow trout during steady-state swimming at 1.7 BL s<sup>-1</sup>. Rates of lactate appearance (*R<sub>a</sub>*) and disposal (*R<sub>d</sub>*) are shown in red and green, respectively. Values are means  $\pm$  s.e.m. (*N*=6). Asterisks indicate significant differences from baseline at time 0 (\**P*<0.05). Dashed line indicates the time at which exercise was started.

have been demonstrated in mammals (Brooks, 1998; Gladden, 2004). Exercising fish may also rely on lactate shuttles to transport the end-product from white muscle to aerobic tissues for oxidation. In trout, however, inter-tissue lactate shuttles may be constrained by white muscle lactate retention – a phenomenon that has intrigued fish biologists for decades (Turner and Wood, 1983; Wang et al., 1997). We have recently demonstrated that white muscle has a very limited capacity to export lactate because this tissue shows minimal expression of monocarboxylate transporters, even after exercise (Omlin and Weber, 2013). Presumably, *R<sub>a</sub>* and *R<sub>d</sub>* could be stimulated much more than observed here during exercise if white muscle expressed monocarboxylate transporters at the higher levels prevalent in mammalian glycolytic fibers. The spatial separation of fish white and red muscles also precludes the intramuscular lactate shuttle between adjacent glycolytic and oxidative fibers, which is well characterized within mixed mammalian muscles (Brooks, 1998; Van Hall, 2000).

#### Previous experiments by bolus injection underestimated lactate fluxes

Continuous tracer infusion is the preferred method to quantify *in vivo* metabolite fluxes accurately in humans and animals (Wolfe, 1992). Its application to fish (Omlin and Weber, 2010; present study) shows that the lactate fluxes of rainbow trout are approximately three times higher than previously estimated by bolus injection (Weber, 1991). This is because the bolus injection method relies on problematic estimates of surface areas to calculate flux (flux=dose injected/surface area under the specific activity decay curve). Overestimation of surface area under the decay curve can happen for a number of reasons: (1) curve fitting for early sampling points is extremely inaccurate because specific activity changes very rapidly just after the injection of the bolus; (2) <sup>14</sup>C recycling can artificially increase specific activities in the right-hand side of the decay curve (later sampling times); and (3) a single catheter is used

for bolus injection of the tracer and subsequent blood sampling; therefore, residual bolus activity on the catheter walls can increase specific activity in sampled blood by contamination. Finally, the bolus injection technique assumes steady-state conditions, and each experiment only yields a single measurement of flux, two important restrictions that do not apply to continuous tracer infusion. For all of these reasons, bolus injection has been virtually abandoned as a practical tool to quantify metabolite kinetics.

#### Effects of catheters and blood sampling on swimming performance

We have tested whether applying the continuous tracer infusion technique has an impact on key physiological indices of performance:  $\dot{M}_{O_2}$ , TCOT, NCOT and *U<sub>crit</sub>*. TCOT and NCOT were quantified separately because they are both helpful, but in different contexts. For example, TCOT is useful to determine the cost of migration. By contrast, NCOT only takes into account the energy used to power movement and excludes maintenance costs incurred by all tissues including muscle. In biomechanics, NCOT is particularly useful to quantify the efficiency of muscle contraction. It has been shown that instrumenting aquatic animals with catheters, tracking systems or individual markers can affect locomotion energetics (Bannasch et al., 1994; Culik and Wilson, 1991; Gauthier-Clerc et al., 2004). However, these devices only impact locomotion at high speeds because hydrodynamic drag forces increase with the square of velocity (Biewener, 2003). In this study, we have quantified the cost of transport from measured rates of oxygen consumption, but have ignored the contribution of anaerobic metabolism. To estimate the potential error introduced by this approach, we have calculated the relative importance of anaerobic compared with aerobic metabolism at the highest swimming speed for which lactate kinetics could be measured. Assuming that carbohydrate was the only fuel consumed and that *R<sub>d</sub>* was either completely oxidized or not oxidized at all, we have determined a range of potential errors. At 2.8 BL s<sup>-1</sup>, metabolic rate was 202 μmol O<sub>2</sub> kg<sup>-1</sup> min<sup>-1</sup> (Fig. 1A), or 33.7 μmol glucose kg<sup>-1</sup> min<sup>-1</sup> or 1212 μmol ATP kg<sup>-1</sup> min<sup>-1</sup>. If 100% of *R<sub>d</sub>* was oxidized, anaerobic metabolism would be 5.7 μmol lactate kg<sup>-1</sup> min<sup>-1</sup> (=net lactate production=*R<sub>a</sub>*–*R<sub>d</sub>*; Fig. 4B) or 11.4 μmol ATP kg<sup>-1</sup> min<sup>-1</sup>, and would only account for <1% of aerobic metabolism (=11.4/1212). If 0% of *R<sub>d</sub>* were oxidized (a very unlikely scenario), anaerobic metabolism would be 40.4 μmol lactate kg<sup>-1</sup> min<sup>-1</sup> (= *R<sub>a</sub>*) or 80.8 μmol ATP kg<sup>-1</sup> min<sup>-1</sup>, and would account for 6.7% of aerobic metabolism (=80.8/1212). Therefore, cost of transport could have been underestimated by 1 to 6.7% at the highest swimming speed. Results show that two catheters exiting from the snout of the fish do not significantly increase  $\dot{M}_{O_2}$  or TCOT at any swimming speed tested in our study (Figs 1, 2). However, catheterized animals have a higher NCOT than non-instrumented controls (+21% for sham catheterized and +29% for lactate kinetics) when they travel faster than 2.4 BL s<sup>-1</sup>, and their *U<sub>crit</sub>* is reduced (Fig. 2B, Fig. 3A). The higher NCOT observed in instrumented animals is not due to differences in resting  $\dot{M}_{O_2}$  because catheterization has no effect on this parameter (Table 1), indicating that the stress of surgery is very low. All metabolite fluxes previously measured by continuous tracer infusion in swimming fish were not influenced by double catheterization because the experiments were performed at low, sustainable speeds (<1.5 BL s<sup>-1</sup>) and NCOT is only affected above 2.4 BL s<sup>-1</sup> (Bernard et al., 1999; Magnoni et al., 2008; Shanghavi and Weber, 1999).

In rainbow trout, the relationship between cost of transport and swimming speed is U-shaped (Fig. 2A), as predicted by various

models derived exclusively from hydrodynamic theory (Pettersson and Hedenström, 2000; Wakeman and Wohlschlag, 1981). This finding is highly consistent with empirical observations made in other fish species including European sea bass (Claireaux et al., 2006), Atlantic cod (Syme et al., 2008), Pacific bonito (Sepulveda et al., 2003), several flatfish (Duthie, 1982) and zebrafish (Palstra et al., 2010). Here, optimal swimming speed ( $U_{\text{opt}}$ =speed with minimal cost of transport) was  $2.1 \text{ BL s}^{-1}$  for TCOT (Fig. 2A) and  $1.1 \text{ BL s}^{-1}$  for NCOT (Fig. 2B). This interesting difference has been commonly reported in the fish literature. It indicates that maximal aerobic efficiency (Webb, 1971) is achieved at  $\sim 70\% U_{\text{crit}}$ , whereas maximal muscle efficiency occurs at  $\sim 30\text{--}40\% U_{\text{crit}}$  (Luna-Acosta et al., 2011; Palstra et al., 2008; Palstra et al., 2010).

Critical swimming speed was significantly reduced by the experimental manipulations necessary to measure metabolite kinetics. On their own, the drag forces elicited by the two catheters decreased  $U_{\text{crit}}$  by 11%. When the stress of sampling blood was added to this mechanical interference,  $U_{\text{crit}}$  was further decreased by 6% ( $\sim 17\%$  compared with non-instrumented controls; Fig. 3A), possibly through a reduction in oxygen transport. Another study reported no effect of cannulation on  $U_{\text{crit}}$  (Butler et al., 1992), but the measurements were made on brown trout implanted with a single catheter that may have caused less drag than the two catheters of our experiments. It may also be easier to demonstrate significant effects of hydrodynamic drag in rainbow trout because they have a better swimming capacity ( $U_{\text{crit}}$  of  $2.8\text{--}3.4 \text{ BL s}^{-1}$ ) than brown trout, which are less athletic ( $U_{\text{crit}}$  of  $\sim 2.2 \text{ BL s}^{-1}$ ) (Butler et al., 1992).

### Conclusions

This study is the first to show how the lactate kinetics of an ectotherm change with exercise intensity, and quantifies the rates of lactate production and disposal in rainbow trout, from rest to  $U_{\text{crit}}$ . This aerobic species maintains high baseline lactate fluxes of  $24 \mu\text{mol kg}^{-1} \text{ min}^{-1}$  that are only increased at speeds greater than  $2.4 \text{ BL s}^{-1}$  or  $\sim 85\% U_{\text{crit}}$ . When the fish accelerates to reach  $U_{\text{crit}}$ ,  $R_a$  is more strongly stimulated than  $R_d$  ( $+67\%$  versus  $+41\%$ ) and this mismatch causes a fourfold increase in blood lactate concentration. Without this stimulation of  $R_d$ , the accumulation of end-product would double and impose an extra load on the circulation. Increased lactate oxidation by aerobic tissues (red muscle, heart, kidney and brain) is probably responsible for the higher  $R_d$  observed during intense swimming. Results also show that the hydrodynamic drag from double catheterization and blood sampling needed to measure metabolite kinetics in swimming trout have no significant impact on  $\dot{M}_{\text{O}_2}$  or TCOT. However, these experimental procedures affect locomotion energetics by increasing NCOT at speeds  $>2.4 \text{ BL s}^{-1}$  and by decreasing  $U_{\text{crit}}$ .

### ACKNOWLEDGEMENTS

We thank Bill Fletcher and Christopher Laverne for taking care of the animals.

### AUTHOR CONTRIBUTIONS

All authors conceived and designed the experiments. They were all involved in interpreting the results and writing the article. L.T. and T.O. carried out the measurements.

### COMPETING INTERESTS

No competing interests declared.

### FUNDING

This work was supported by grants from the Natural Sciences and Engineering Research Council of Canada (NSERC) to J.-M.W. [Discovery grant 105639-2012 and Research Tools and Instruments grant 390071-2010]. L.T. was the recipient

of an International Mobility Fellowship from Région Rhône-Alpes (France) and a Travelling Fellowship from The Company of Biologists Ltd (UK).

### REFERENCES

- Bannasch, R., Wilson, R. P. and Culik, B. (1994). Hydrodynamic aspects of design and attachment of a back-mounted device in penguins. *J. Exp. Biol.* **194**, 83–96.
- Bergman, B. C., Wolfel, E. E., Butterfield, G. E., Lopaschuk, G. D., Casazza, G. A., Horning, M. A. and Brooks, G. A. (1999). Active muscle and whole body lactate kinetics after endurance training in men. *J. Appl. Physiol.* **87**, 1684–1696.
- Bergmeyer, H. U. (1985). *Methods of Enzymatic Analysis*. Weinheim: VCH.
- Bernard, S. F., Reidy, S. P., Zwingelstein, G. and Weber, J.-M. (1999). Glycerol and fatty acid kinetics in rainbow trout: effects of endurance swimming. *J. Exp. Biol.* **202**, 279–288.
- Biewener, A. A. (2003). *Animal Locomotion*. New York, NY: Oxford University Press.
- Billinski, E. and Jonas, R. E. E. (1972). Oxidation of lactate to carbon dioxide by rainbow trout (*Salmo gairdneri*) tissues. *J. Fish. Res. Board Can.* **29**, 1467–1471.
- Brett, J. (1964). The respiratory metabolism and swimming performance of young sockeye salmon. *J. Fish. Res. Bd. Can.* **21**, 1183–1226.
- Brett, J. R. (1972). The metabolic demand for oxygen in fish, particularly salmonids, and a comparison with other vertebrates. *Respir. Physiol.* **14**, 151–170.
- Brooks, G. A. (1991). Current concepts in lactate exchange. *Med. Sci. Sports Exerc.* **23**, 895–906.
- Brooks, G. A. (1998). Mammalian fuel utilization during sustained exercise. *Comp. Biochem. Physiol.* **120B**, 89–107.
- Butler, P., Day, N. and Namba, K. (1992). Interactive effects of seasonal temperature and low pH on resting oxygen uptake and swimming performance of adult brown trout *Salmo trutta*. *J. Exp. Biol.* **165**, 195–212.
- Cameron, J. N. and Cech, J. J., Jr (1990). Lactate kinetics in exercised channel catfish, *Ictalurus punctatus*. *Physiol. Zool.* **63**, 909–920.
- Claireaux, G., Couturier, C. and Groison, A.-L. (2006). Effect of temperature on maximum swimming speed and cost of transport in juvenile European sea bass (*Dicentrarchus labrax*). *J. Exp. Biol.* **209**, 3420–3428.
- Clark, M. G., Bloxham, D. P., Holland, P. C. and Lardy, H. A. (1974). Estimation of the fructose 1,6-diphosphatase-phosphofructokinase substrate cycle and its relationship to gluconeogenesis in rat liver *in vivo*. *J. Biol. Chem.* **249**, 279–290.
- Culik, B. and Wilson, R. P. (1991). Swimming energetics and performance of instrumented Adélie penguins (*Pygoscelis adeliae*). *J. Exp. Biol.* **158**, 355–368.
- Donovan, C. M. and Brooks, G. A. (1983). Endurance training affects lactate clearance, not lactate production. *Am. J. Physiol.* **244**, E83–E92.
- Duthie, G. G. (1982). The respiratory metabolism of temperature-adapted flatfish at rest and during swimming activity and the use of anaerobic metabolism at moderate swimming speeds. *J. Exp. Biol.* **97**, 359–373.
- Farrell, A. P. (2008). Comparisons of swimming performance in rainbow trout using constant acceleration and critical swimming speed tests. *J. Fish Biol.* **72**, 693–710.
- Gauthier-Clerc, M., Gendner, J.-P., Ribic, C. A., Fraser, W. R., Woehler, E. J., Descamps, S., Gilly, C., Le Bohec, C. and Le Maho, Y. (2004). Long-term effects of flipper bands on penguins. *Proc. Biol. Sci.* **271** Suppl. 6, S423–S426.
- Gladden, L. B. (2004). Lactate metabolism: a new paradigm for the third millennium. *J. Physiol.* **558**, 5–30.
- Haman, F. and Weber, J.-M. (1996). Continuous tracer infusion to measure *in vivo* metabolite turnover rates in trout. *J. Exp. Biol.* **199**, 1157–1162.
- Haman, F., Powell, M. and Weber, J.-M. (1997). Reliability of continuous tracer infusion for measuring glucose turnover rate in rainbow trout. *J. Exp. Biol.* **200**, 2557–2563.
- Issekutz, B., Jr, Shaw, W. A. and Issekutz, A. C. (1976). Lactate metabolism in resting and exercising dogs. *J. Appl. Physiol.* **40**, 312–319.
- Jain, K., Hamilton, J. and Farrell, A. (1997). Use of a ramp velocity test to measure critical swimming speed in rainbow trout (*Onchorhynchus mykiss*). *Comp. Biochem. Physiol.* **117A**, 441–444.
- Lancin, H. P., McMorran, L. E. and Driedzic, W. R. (1980). Rates of glucose and lactate oxidation by the perfused isolated trout (*Salvelinus fontinalis*) heart. *Can. J. Zool.* **58**, 1708–1711.
- Luna-Acosta, A., Lefrançois, C., Millot, S., Chatain, B. and Bégout, M. L. (2011). Physiological response in different strains of sea bass (*Dicentrarchus labrax*): swimming and aerobic metabolic capacities. *Aquaculture* **317**, 162–167.
- Magnoni, L., Vaillancourt, E. and Weber, J.-M. (2008). High resting triacylglycerol turnover of rainbow trout exceeds the energy requirements of endurance swimming. *Am. J. Physiol.* **295**, R309–R315.
- Milligan, C. L. and Farrell, A. P. (1991). Lactate utilization by an *in situ* perfused trout heart: effects of workload and blockers of lactate transport. *J. Exp. Biol.* **155**, 357–373.
- Milligan, C. L. and McDonald, D. G. (1988). *In vivo* lactate kinetics at rest and during recovery from exhaustive exercise in coho salmon (*Oncorhynchus kisutch*) and starry flounder (*Platichthys stellatus*). *J. Exp. Biol.* **135**, 119–131.
- Moyes, C. D. and West, T. G. (1995). Exercise metabolism of fish. *Biochem. Mol. Biol. Fishes* **4**, 367–392.
- Omlin, T. and Weber, J.-M. (2010). Hypoxia stimulates lactate disposal in rainbow trout. *J. Exp. Biol.* **213**, 3802–3809.
- Omlin, T. and Weber, J.-M. (2013). Exhausting exercise and tissue-specific expression of monocarboxylate transporters in rainbow trout. *Am. J. Physiol.* **304**, R1036–R1043.
- Palstra, A., van Ginneken, V. and van den Thillart, G. (2008). Cost of transport and optimal swimming speed in farmed and wild European silver eels (*Anguilla anguilla*). *Comp. Biochem. Physiol.* **151A**, 37–44.
- Palstra, A. P., Tudorache, C., Rovira, M., Brittijn, S. A., Burgerhout, E., van den Thillart, G. E. J. M., Spaik, H. P. and Planas, J. V. (2010). Establishing zebrafish as a novel exercise model: swimming economy, swimming-enhanced growth and muscle growth marker gene expression. *PLoS ONE* **5**, e14483.

- Petterson, L. B. and Hedenström, A.** (2000). Energetics, cost reduction and functional consequences of fish morphology. *Proc. Biol. Sci.* **267**, 759-764.
- Philp, A., Macdonald, A. L. and Watt, P. W.** (2005). Lactate – a signal coordinating cell and systemic function. *J. Exp. Biol.* **208**, 4561-4575.
- Schmidt-Nielsen, K.** (1972). Locomotion: energy cost of swimming, flying, and running. *Science* **177**, 222-228.
- Sepulveda, C. A., Dickson, K. A. and Graham, J. B.** (2003). Swimming performance studies on the eastern Pacific bonito *Sarda chiliensis*, a close relative of the tunas (family Scombridae) I. Energetics. *J. Exp. Biol.* **206**, 2739-2748.
- Shanghavi, D. S. and Weber, J.-M.** (1999). Effects of sustained swimming on hepatic glucose production of rainbow trout. *J. Exp. Biol.* **202**, 2161-2166.
- Soengas, J. L. and Aldegunde, M.** (2002). Energy metabolism of fish brain. *Comp. Biochem. Physiol.* **131B**, 271-296.
- Stanley, W. C., Gertz, E. W., Wisneski, J. A., Morris, D. L., Neese, R. A. and Brooks, G. A.** (1985). Systemic lactate kinetics during graded exercise in man. *Am. J. Physiol.* **249**, E595-E602.
- Steele, R.** (1959). Influences of glucose loading and of injected insulin on hepatic glucose output. *Ann. New York Acad. Sci.* **82**, 420-430.
- Syme, D. A., Gollock, M., Freeman, M. J. and Gamperl, A. K.** (2008). Power isn't everything: muscle function and energetic costs during steady swimming in Atlantic cod (*Gadus morhua*). *Physiol. Biochem. Zool.* **81**, 320-335.
- Turner, J. D. and Wood, C. M.** (1983). Factors affecting lactate and proton efflux from pre-exercised, isolated-perfused rainbow trout trunks. *J. Exp. Biol.* **105**, 395-401.
- Van Hall, G.** (2000). Lactate as a fuel for mitochondrial respiration. *Acta Physiol. Scand.* **168**, 643-656.
- Van Hall, G., Jensen-Urstad, M., Rosdahl, H., Holmberg, H.-C., Saltin, B. and Calbet, J. A. L.** (2003). Leg and arm lactate and substrate kinetics during exercise. *Am. J. Physiol.* **284**, E193-E205.
- Wakeman, J. M. and Wohlschlag, D. E.** (1981). Least-cost swimming speeds and transportation costs in some pelagic estuarine fishes. *Fish. Res.* **1**, 117-127.
- Wang, Y., Wright, P. M., Heigenhauser, G. J. and Wood, C. M.** (1997). Lactate transport by rainbow trout white muscle: kinetic characteristics and sensitivity to inhibitors. *Am. J. Physiol.* **272**, R1577-R1587.
- Webb, P. W.** (1971). The swimming energetics of trout. II. Oxygen consumption and swimming efficiency. *J. Exp. Biol.* **55**, 521-540.
- Weber, J.-M.** (1991). Effect of endurance swimming on the lactate kinetics of rainbow trout. *J. Exp. Biol.* **158**, 463-476.
- Weber, J.-M., Brill, R. W. and Hochachka, P. W.** (1986). Mammalian metabolite flux rates in a teleost: lactate and glucose turnover in tuna. *Am. J. Physiol.* **250**, R452-R458.
- Weber, J.-M., Parkhouse, W. S., Dobson, G. P., Harman, J. C., Snow, D. H. and Hochachka, P. W.** (1987). Lactate kinetics in exercising thoroughbred horses: regulation of turnover rate in plasma. *Am. J. Physiol.* **253**, R896-R903.
- Wolf, K.** (1963). Physiological saline for fresh water teleosts. *Prog. Fish-Cult.* **25**, 135-140.
- Wolfe, R. R.** (1992). *Radioactive and Stable Isotope Tracers in Biomedicine: Principles and Practice of Kinetic Analysis*. New York, NY: Wiley-Liss.
